# Supplementary material for: Extensively Hydrolyzed Hypoallergenic Infant Formula with Retained T Cell Reactivity
Source: MDPI journal article supplement (doi:10.3390/nu15010111), 2022-12-26
Supplement: s1 [file s1]

### Supplementary Materials:

Pilot experiment for determination of an allergen dose yielding basophil activation in the increasing part of the bell-shaped degranulation curve.

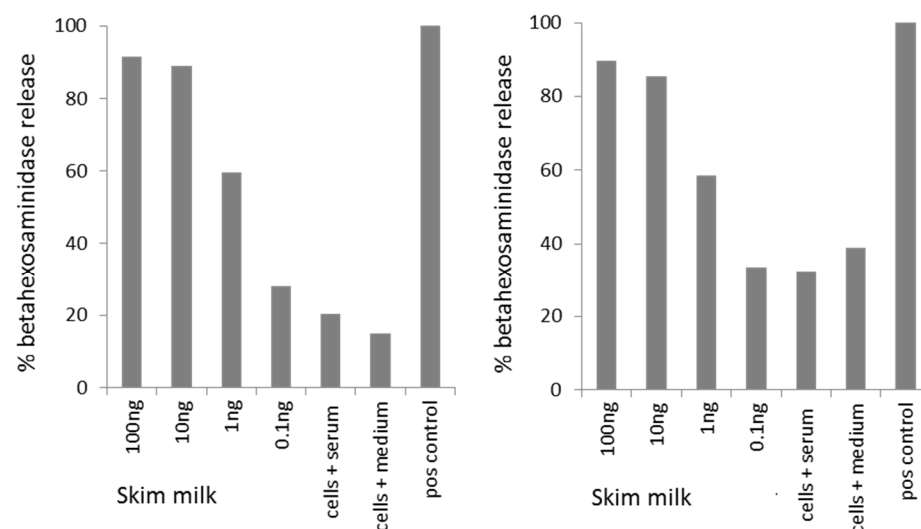

**Figure S1.** Pilot experiments determining the allergen dose inducing increasing basophil degranulation. Rat basophil leukemia (RBL) cells expressing the human FcεRI were loaded with serum IgE from a cow's milk allergic patient (shown are two independent experiments (left, right) performed with serum IgE from patient #54. The percentages of released hexosaminidase as compared to total lysis (y-axes) by different concentrations of milk allergen extract (x-axes) are shown. Negative controls are cells+serum only, cells+medium only and a positive control was carried out with an unrelated control allergen (pos control).

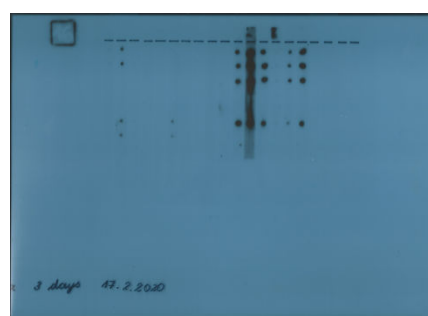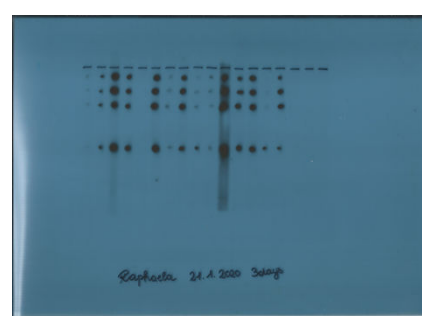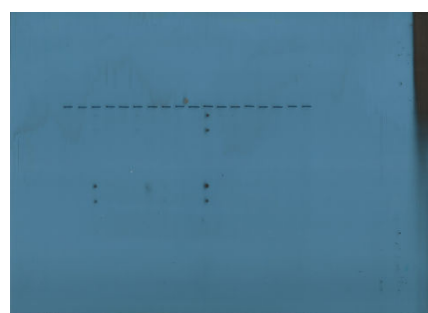

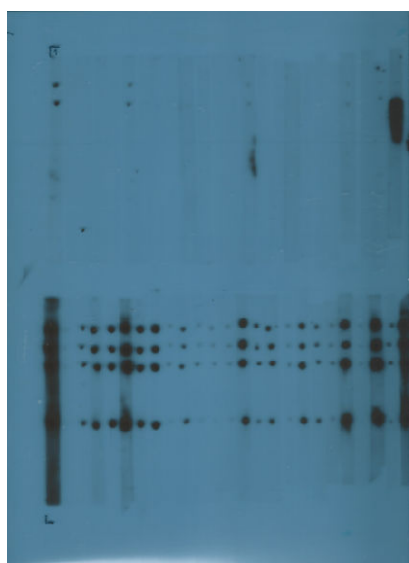

**Figure S2.** Original autoradiographs from Figure 2 without cropping.
